# Supplementary material for: A simple spraying process greatly enhanced field emission of novel T-ZnO-supported CNT emitters
Source: Royal Society of Chemistry journal article supplement (doi:10.1039/c5tc03507d), 2016-01-01
Supplement: c5tc03507d1.pdf [file c5tc03507d1.pdf]

1 **Greatly Enhanced Field Emission of the Novel T-ZnO**  
2 **Supported CNTs Emitters with Simple Spraying Process**

3

4 ZunxianYang\*, Wenhuan Yan, Jun Lv, Kun Qian, Yuxiang Zhang, Jiahui Liu,  
5 Jingwei Ai, Tailiang Guo\*, Enguo Chen, Liqin Hu

6

7 National & Local United Engineering Laboratory of Flat Panel Display Technology,  
8 Fuzhou University, Fuzhou 350002, P. R. China

9

10 **Supporting Information**

11

12

13

14

15

16

17

18

19 **Captions**

20 **Fig.S1 (a)** the low-magnification and high magnification SEM images (**inset**) of as-  
21 prepared pure T-ZnO nanomaterials sprayed on the substrate with low concentration

---

\* Corresponding author should be addressed. Tel.: +86 591 8789 3299;

Fax: +86 591 8789 2643

E-mail: yangzunxian@hotmail.com (Z. Yang)

gtl\_fzu@hotmail.com (T. Guo)

22 T-ZnO precursor solution (5mg T-ZnO: 100ml isopropanol solution); **(b)** the low-  
23 magnification and high magnification SEM images (**inset**) of as-prepared pure T-ZnO  
24 nanomaterials sprayed on the substrate with high concentration T-ZnO precursor  
25 solution (8mg T-ZnO: 100ml isopropanol solution); **(c)** the low-magnification and  
26 high magnification SEM images (**inset**) of as-sprayed T-ZnO and CNT by turns with  
27 low concentration T-ZnO and CNT precursor solutions, respectively(8mg T-ZnO:  
28 100ml isopropanol solution; 0.3g CNT: 1L isopropanol solution); **(d)** the low-  
29 magnification SEM image of as-sprayed T-ZnO and CNT by turns with high  
30 concentration T-ZnO and CNT precursor solutions, respectively(8mg T-ZnO: 100ml  
31 isopropanol solution; 0.5g CNT: 1L isopropanol solution).

32 **Fig.S2 (a)** J-E curves of the samples of the ZnO film consisting of ZnO nanoparticles;  
33 **(b)** the corresponding Fowler-Nordheim (F-N) plots of **(a)**.

34 **Fig.S3** The corresponding luminance photos of the samples of the pure T-ZnO, pure  
35 CNTs and T-ZnO/CNTs composite. **(a)** Pure T-ZnO under the voltage of 400V; **(b)**  
36 Pure CNTs under the voltage of 500V; **(c)** T-ZnO/CNTs composite under the voltage  
37 of 240V.

38 **Fig.S4** the emission stability of pure T-ZnO、 pure CNTs and T-ZnO/CNTs.

39 **Fig.S5** the schematic diagram of the field emission measurement and the  
40 corresponding electronic circuits. **(a)** The schematic diagram of the field emission test;  
41 **(b)** the mechanism diagram for their simple electronic circuits

42

43

44

45

46

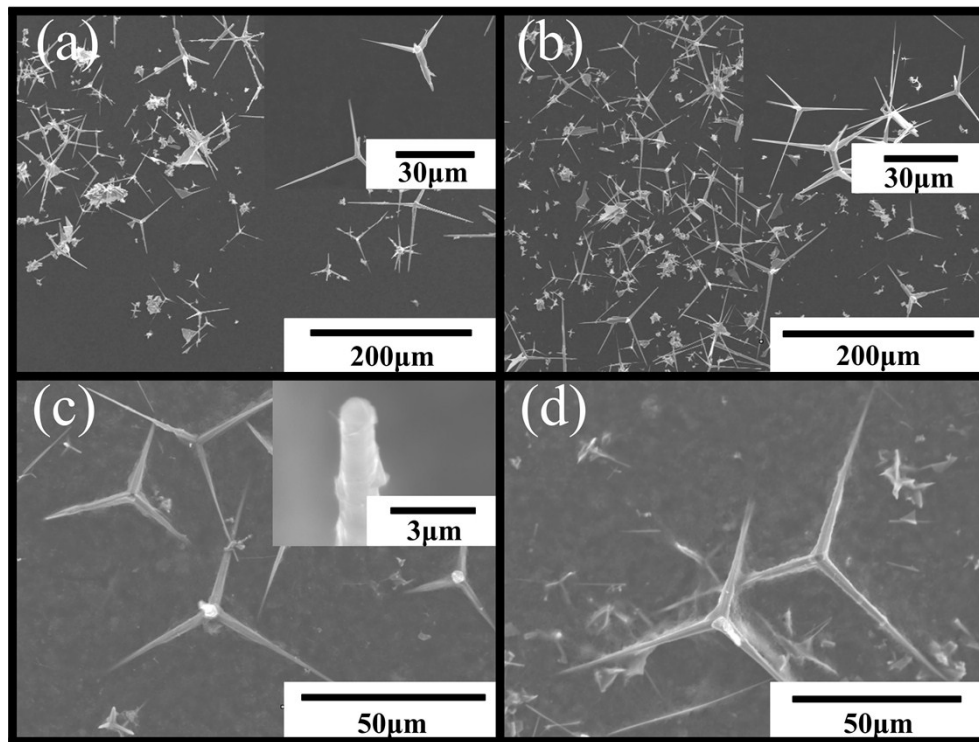

47

48

Fig.S1

49

50

51

52

53

54

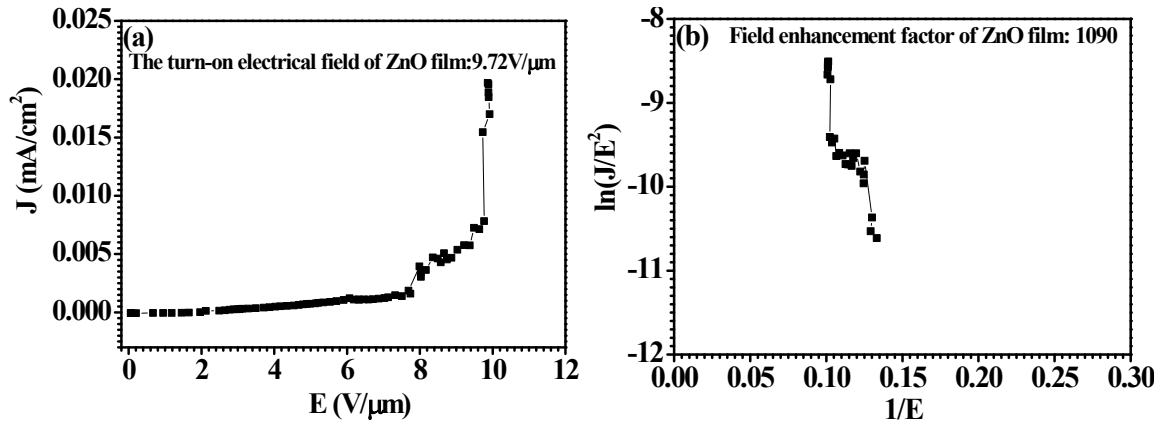

55

56

Fig.S2

57

58

59

60

61

62

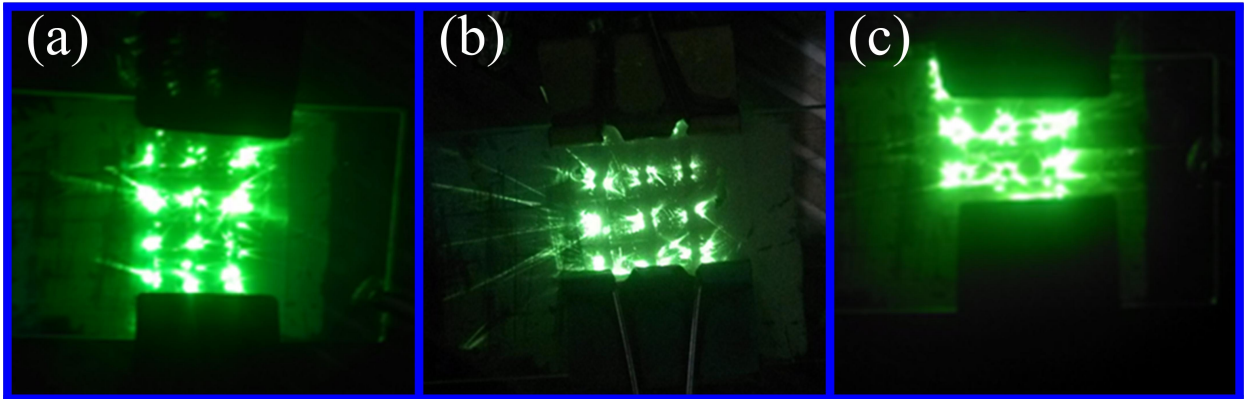

63

64

**Fig.S3**

65

66

67

68

69

70

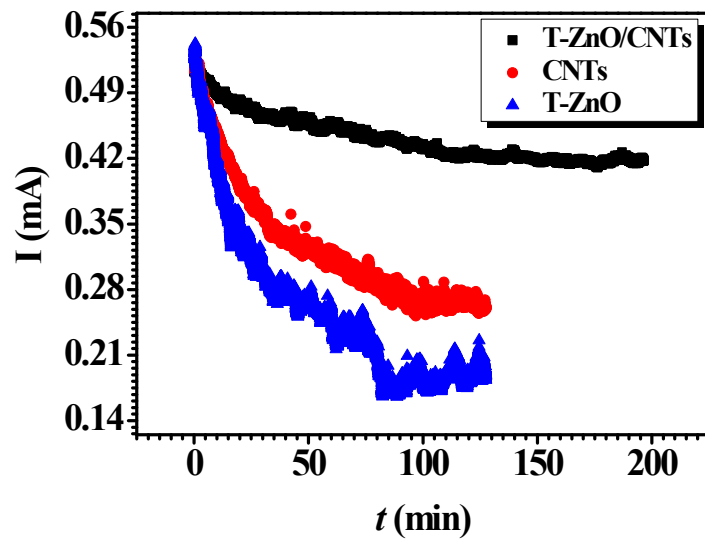

71

72

Fig.S4

73

74

75

76

77

78

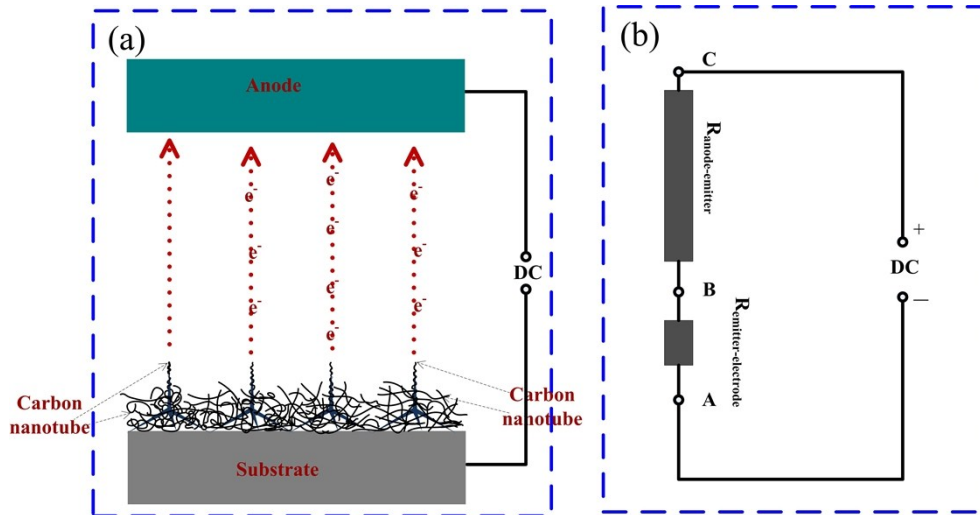

$R_{\text{emitter-electrode}}$  is the resistance between the emitter and Cr-Cu-Cr electrode, which mainly includes the heterojunction resistance between emitters and T-ZnO under reverse bias voltage as well as the Schottky resistance between the T-ZnO and the electrode

$R_{\text{anode-emitter}}$  is the resistance between emitters and anode under high vacuum and high voltage condition.

79

80

**Fig.S5**

81

82

83
